# Supplementary material for: Measuring COVID-19 vaccination coverage: an enhanced age-adjusted two-step floating catchment area model
Source: Springer Nature journal article supplement (doi:10.1186/s40249-021-00904-6), 2021-09-16
Supplement: 40249_2021_904_MOESM1_ESM.pdf [file 40249_2021_904_MOESM1_ESM.pdf]

**Measuring potential spatial accessibility to COVID-19 vaccination centers**

Inputs

Health Facilities (PHs&PHCs)  
"Destination"

Census Tracts Include  
Population Weighted by Age  
"Origin"

Spatial Analysis and  
Model Evaluation

Step 1

Accessibility  
Measurement:  
E2SFCA

$$R_j = \frac{S_j}{\sum_{k \in \{d_{kj} \in D_r\}} P_k W_r} = \frac{S_j}{\sum_{k \in \{d_{kj} \in D_1\}} P_k W_1 + \sum_{k \in \{d_{kj} \in D_2\}} P_k W_2 + \sum_{k \in \{d_{kj} \in D_3\}} P_k W_3}$$

Step 2

$$A_i^F = \sum_{j \in \{d_{ij} \leq D_r\}} R_j W_r = \sum_{j \in \{d_{ij} \leq D_1\}} R_j W_1 + \sum_{j \in \{d_{ij} \leq D_2\}} R_j W_2 + \sum_{j \in \{d_{ij} \leq D_3\}} R_j W_3$$

Buffer Analysis,  
Hexagonal Tessellation,  
Moran's I (Spatial Autocorrelation),  
Voronoi Polygons Method,  
Hub- Distance Lines Method (Closest  
Facility),  
Quantile maps

PSA

- Scenarios**
- 1: Public Hospitals
  - 2: Public Health Centers
  - 3: Public Hospitals & Public Health Centers
  - 4: Proposed Model

Outputs

PSA Maps

Hexagonal Polygons Maps,  
Buffered Road Distance Maps,  
Moran's I Summary Statistics,  
Areas of Influence Map

|                                                                                     |                   |                                                      |  |
|-------------------------------------------------------------------------------------|-------------------|------------------------------------------------------|--|
| <b>Symbols</b>                                                                      |                   | <b>Abbreviations</b>                                 |  |
|  | Inputs            | PSA: Potential Spatial Accessibility                 |  |
|  | Outputs           | E2SFCA: An Enhanced Two-Step Floating Catchment Area |  |
|  | Methods and Tools | PHs: Public Hospitals                                |  |
|                                                                                     |                   | PHCs: Public Health Centres                          |  |
